# Supplementary material for: Analgesic Modalities in Patients Undergoing Open Pancreatoduodenectomy—A Systematic Review and Meta-Analysis
Source: MDPI journal article supplement (doi:10.3390/jcm12144682), 2023-07-14
Supplement: s1 [file s1]

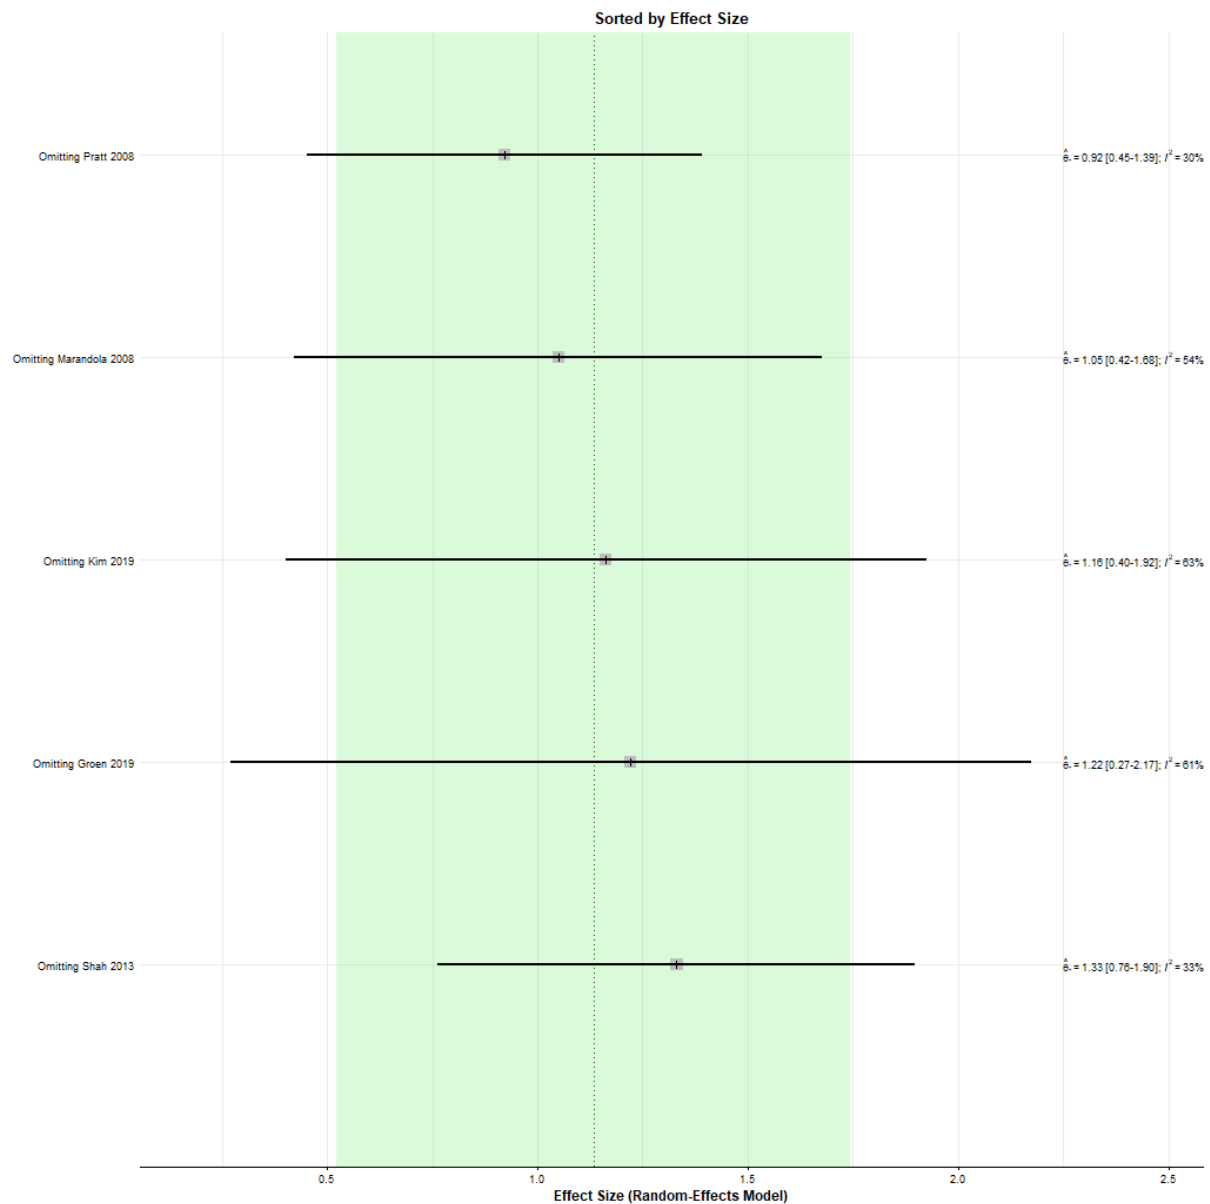

**Supplementary Figure S1.** Leave-one-out sensitivity analysis plot for selected studies for the pain scores on postoperative day 1 in patient-controlled analgesia versus epidural analgesia.

$\hat{\theta}$  = mean difference

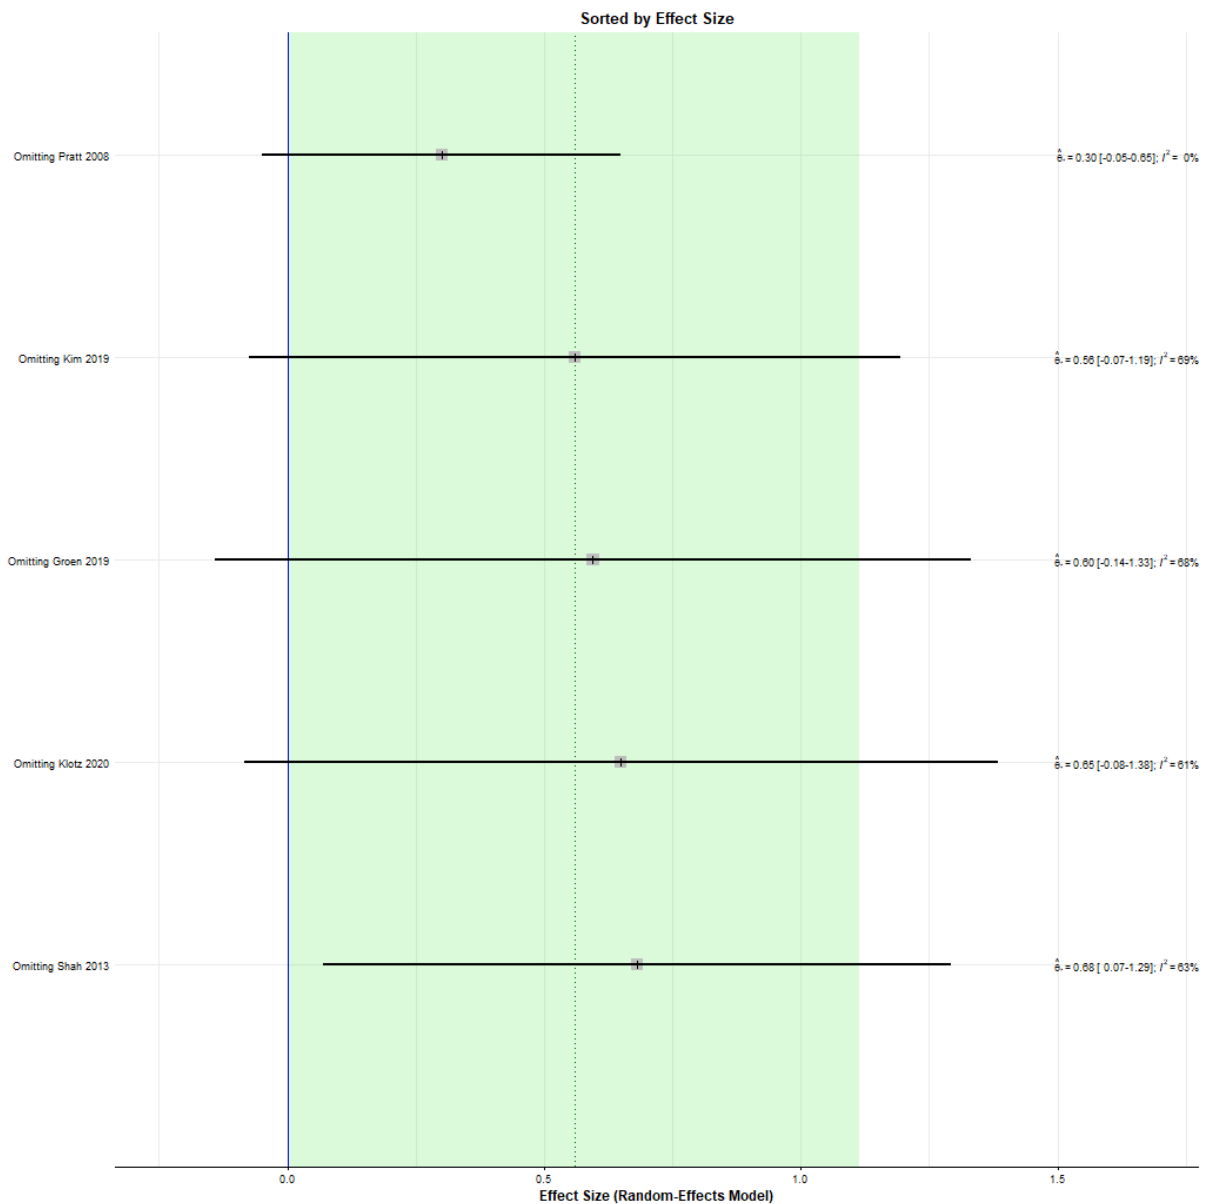

**Supplementary Figure S2.** Leave-one-out sensitivity analysis plot for selected studies for the pain scores on postoperative day 2 in patient-controlled analgesia versus epidural analgesia.

$\hat{\theta}$  = mean difference

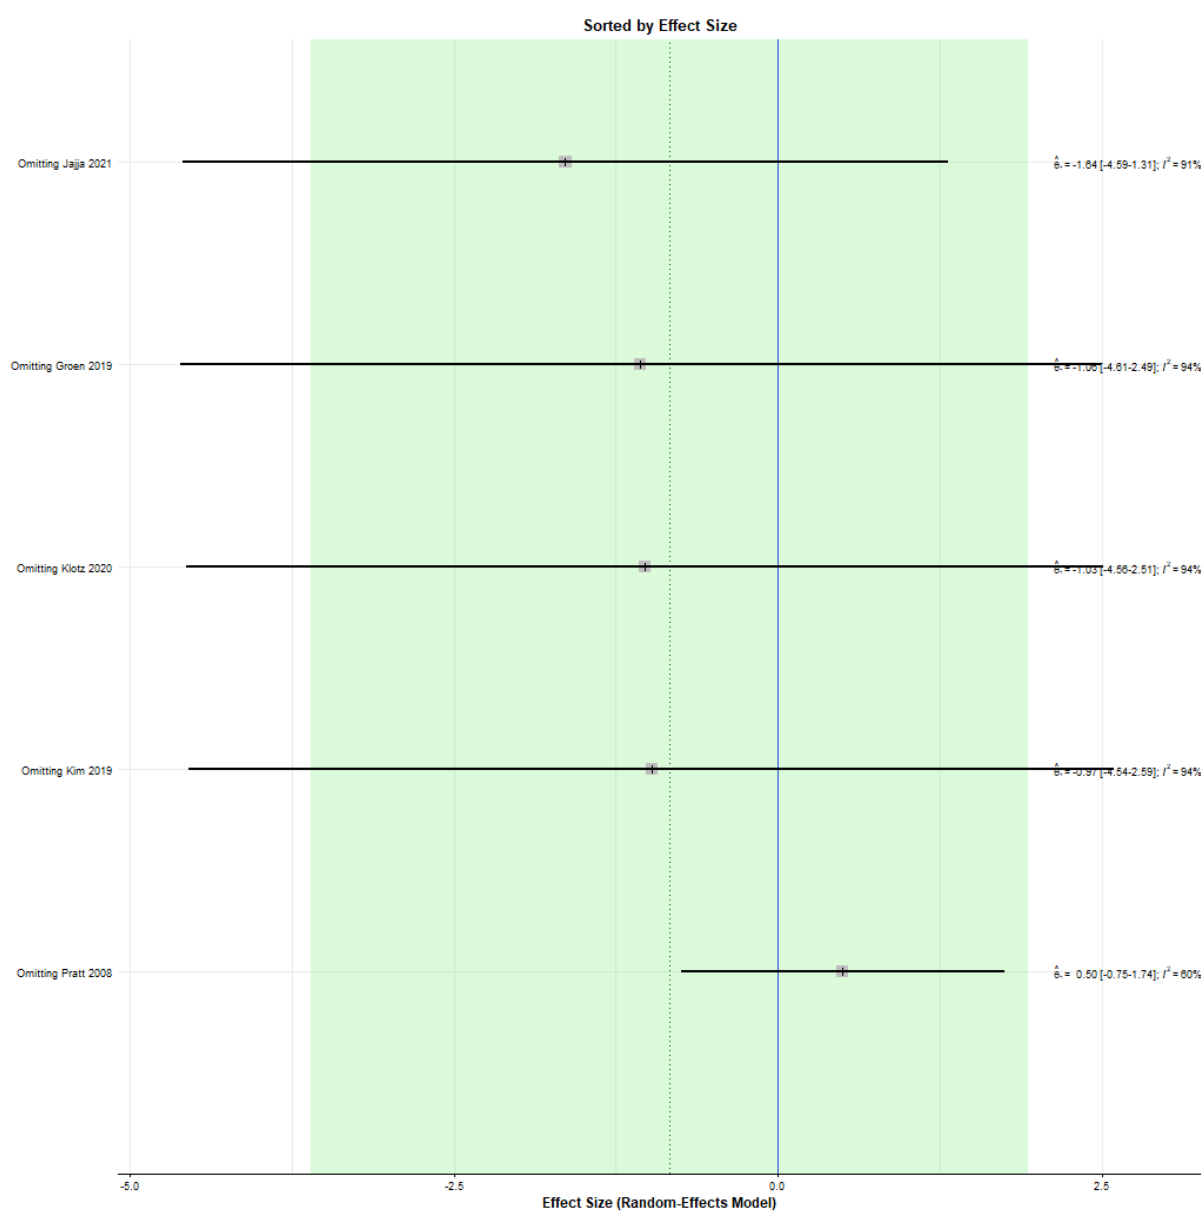

**Supplementary Figure S3.** Leave-one-out sensitivity analysis plot for selected studies for the length of stay (days) in patient-controlled analgesia versus epidural analgesia.

$\hat{\theta}$  = mean difference
